# Supplementary material
Source: publisher site journal article supplement (https://www.dovepress.com/article/593126)
Supplement: Supplementary file 1 [file 593126%20Revised%20Supplementary%20Data.docx]

Pharmacophore hypotheses were validated using [Equation S1](#_bookmark0) and [Equation S2](#_bookmark1) shown below(1)

𝑇𝑟𝑢𝑒 𝑃𝑜𝑠𝑡𝑖𝑣𝑒

𝑆𝑒𝑛𝑠𝑖𝑡𝑖𝑣𝑖𝑡𝑦 % = 𝑇𝑟𝑢𝑒 𝑃𝑜𝑠𝑡𝑖𝑣𝑒 + 𝐹𝑎𝑙𝑠𝑒 𝑁𝑒𝑔𝑎𝑡𝑖𝑣𝑒

× 100

**Equation S1**

𝑆𝑝𝑒𝑐𝑖𝑓𝑖𝑐𝑡𝑦 % =

𝑇𝑟𝑢𝑒 𝑁𝑒𝑔𝑎𝑡𝑖𝑣𝑒

𝑇𝑟𝑢𝑒 𝑁𝑒𝑔𝑎𝑡𝑖𝑣𝑒 + 𝐹𝑎𝑙𝑠𝑒 𝑃𝑜𝑠𝑡𝑖𝑣𝑒 × 100

**Equation S2**

**Table S1.** Chosen Pharmacophore hypothesis with their sensitivity % and Specificity after radius modification of feature 2.

| **Pharmacophoric features** | **Sensitivity %** | **Specificity** |
| --- | --- | --- |
| Acc/Acc/ArH, DA, A+ | 80% | 81.5% |

**Figure S1.** IC₅₀ dose–response curves of ST50940260 against PLᵖʳᵒ.

**Figure S2.** IC₅₀ dose–response curves of ST50940260 and ST103181 against Mᵖʳᵒ.

**Figure S3.** IC₅₀ dose–response curves of the four soluble tested derivatives against PLᵖʳᵒ.

**Table S2.** List of the 30 shortlisted drug like compounds selected for in vitro evaluation, including their docking scores, molecular weights, hydrogen bond counts, experimental testing results, and key interacting residues, which formed the basis for compound selection and prioritization.

| **Structure ID** | **Docking Score (kcal/mol)** | **Key Interacting Residues** | **MW (g/mol)** | **H-bond Count** | **IC50**  **(µM)** |
| --- | --- | --- | --- | --- | --- |
| ST50940260 | -10.215 | Tyr271, Gln267, Asp162 | 339.45 | 2 | 69 ± 4.4 (PLpro),  96.2 ± 12 (Mpro) |
| C228-0187 | -9.279 | Arg164, Tyr271, Gln267 | 404.48 | 2 | N/D |
| Y205-4067 | -9.121 | Arg164, Tyr271, Gly161 | 397.47 | 2 | N/D |
| C228-0551 | -9.082 | Gln267, Tyr271 | 388.48 | 2 | N/D |
| Y041-7203 | -9.065 | Tyr271, Gln267, Gly161 | 312.37 | 3 | N/D |
| D685-0149 | -9.056 | Asp300, Arg164, Tyr262, Gln267, Gly161, Tyr271 | 361.82 | 2 | N/D |
| D685-0158 | -9.038 | Gly161, Tyr271, Tyr266 | 311.77 | 2 | N/D |
| ST103303 | -8.992 | Gly161, Gln267, Tyr262 | 319.39 | 2 | N/D |
| ST005461 | -8.957 | Tyr271, Gln267 | 296.39 | 1 | N/D |
| ST50888593 | -8.922 | Tyr271, Gln267, Tyr262 | 361.48 | 1 | N/D |
| ST50925319 | -8.888 | Tyr271, Gln267 | 326.41 | 2 | N/D |
| G546-0139 | -8.867 | Gln267, Tyr271, Gly161 | 303.36 | 2 | N/D |
| ST50115446 | -8.828 | Tyr271, Gly161, Gln267 | 339.39 | 2 | N/D |
| Y042-6759 | -8.802 | Tyr266, Tyr271, Gly161, Asp162, Gln267 | 407.49 | 4 | N/D |
| D685-0013 | -8.752 | Gln267, Gly161, Tyr271 | 307.39 | 2 | N/D |
| ST50070593 | -8.734 | Tyr271, Gln267, Tyr262, Gly161 | 325.43 | 3 | N/D |
| G546-0136 | -8.682 | Gln267, Gly161, Tyr271 | 321.37 | 2 | N/D |
| L006-0011 | -8.647 | Gln267, Gly161, Tyr271 | 276.33 | 2 | N/D |
| D685-0157 | -8.588 | Gln267, Tyr271, Gly161 | 277.32 | 2 | N/D |
| D685-0100 | -8.439 | Gln267, Gly161, Tyr271 | 357.41 | 2 | N/D |
| Y200-0627 | -8.278 | Gln267, Tyr271 | 367.44 | 1 | N/D |
| Y040-5672 | -8.209 | Tyr266, Gln267, Tyr271, Gly161 | 371.41 | 2 | N/D |
| ST103181 | -8.085 | Gly269, Gly161, Tyr271 | 243.26 | 3 | 102 ± 3.6 (Mpro) |
| HTS03421 | -8.055 | Tyr271, Gly161, Gln267 | 285.35 | 2 | N/D |
| ST063445 | -7.882 | Tyr271, Gln267 | 298.29 | 3 | N/D |
| Y042-6741 | -7.573 | Tyr266, Tyr262, Gly161, Tyr271 | 357.47 | 2 | N/D |
| C387-0152 | -6.879 | Tyr266, Tyr262, Tyr271 | 389.47 | 1 | N/D |
| C387-0729 | -6.747 | Arg164, Gln267 | 387.43 | 1 | N/D |
| Y043-8439 | -6.731 | Tyr266, Tyr271, Gln267 | 338.45 | 1 | N/D |
| G751-2321 | -6.653 | Tyr262, Tyr266 | 356.41 | 1 | N/D |

*N/D: Not Determined*

**References**

1. Braga RC, Andrade CH. Assessing the Performance of 3D Pharmacophore Models in Virtual Screening: How Good are They? Curr Top Med Chem. 2013 May 1;13(9):1127–38.
